# Supplementary material
Source: PubMed Central journal article supplement (PMC6325024)
Supplement: NIHMS1513033-supplement-1.pdf [file NIHMS1513033-supplement-1.pdf]

Supplemental Table I: Antibodies for Immunofluorescence and Flow cytometry

| Antibody                        | Clone      | Fluorochrome  | Dilution | Catalog #                  |
|---------------------------------|------------|---------------|----------|----------------------------|
| HIF-1 alpha                     | Monoclonal | Alexa 647     | 1:20     | R & D systems, IC1935R     |
| HIF-2 alpha                     | Polyclonal | Un-conjugated | 1:100    | Novus, NB100-122           |
| GLUT-1                          | EPR3915    | Alexa 488     | 1:50     | Abcam, ab195359            |
| GLUT-3                          | Polyclonal | FITC          | 1:200    | Abcam, ab136180            |
| MCT-4<br>(SLC16A3)              | Polyclonal | Un-conjugated | 1:100    | Novus, NBP1-81251          |
| Hypoxyprome-1<br>(Pimonidazole) | Monoclonal | FITC          | 1:100    | Hypoxyprome, FITC-Mab      |
| Donkey anti-<br>Rabbit          | Polyclonal | Alexa 488     | 1:200    | Molecular Probes<br>A21206 |
| Isotype Control                 | Monoclonal | Alexa 647     | 1:20     | R & D systems, IC002R      |
| CD4                             | RM4-5      | BV605         | 1:100    | BD Biosciences, 563151     |
| CD11b                           | M1/70      | PerCp-Cy5.5   | 1:100    | BD Biosciences, 550993     |
| CD45                            | 30F-11     | PE-Cy7        | 1:100    | BD Biosciences, 552848     |
| Ly6G                            | 1A8        | Alexa 700     | 1:100    | BD Biosciences, 561236     |
